# Supplementary material
Source: HighWire-hosted journal article supplement (https://qualitysafety.bmj.com/highwire/filestream/147599/field_highwire_adjunct_files/0/bmjqs-2012-000942supp.pdf)
Supplement: bmjqs-2012-000942supp.pdf [file bmjqs-2012-000942supp.pdf]

# ANTS System –Observation and Rating Sheet

**Consultant:** \_\_\_\_\_  
**Trainee:** \_\_\_\_\_  
**Date:** \_\_\_\_\_

| <i>Categories</i>          | <i>Elements</i>                     | <i>Observations</i> | <i>Element Rating</i> | <i>Debriefing notes and category rating</i> |
|----------------------------|-------------------------------------|---------------------|-----------------------|---------------------------------------------|
| <b>Task Management</b>     | Planning & preparing                |                     |                       |                                             |
|                            | Prioritising                        |                     |                       |                                             |
|                            | Providing & maintaining standards   |                     |                       |                                             |
|                            | Identifying and utilising resources |                     |                       |                                             |
| <b>Team Working</b>        | Co-ordinating activities with team  |                     |                       |                                             |
|                            | Exchanging information              |                     |                       |                                             |
|                            | Using authority & assertiveness     |                     |                       |                                             |
|                            | Assessing capabilities              |                     |                       |                                             |
|                            | Supporting others                   |                     |                       |                                             |
| <b>Situation Awareness</b> | Gathering information               |                     |                       |                                             |
|                            | Recognising & understanding         |                     |                       |                                             |
|                            | Anticipating                        |                     |                       |                                             |
| <b>Decision Making</b>     | Identifying options                 |                     |                       |                                             |
|                            | Balancing risks & selecting options |                     |                       |                                             |
|                            | Re-evaluating                       |                     |                       |                                             |

## ANTS System –Observation and Rating Sheet

### Additional Notes

| Rating Options      | Descriptor                                                                                                                   |
|---------------------|------------------------------------------------------------------------------------------------------------------------------|
| 4 – Good            | Performance was of a consistently high standard, enhancing patient safety; it could be used as a positive example for others |
| 3 – Acceptable      | Performance was of a satisfactory standard but could be improved                                                             |
| 2 – Marginal        | Performance indicated cause for concern, considerable improvement is needed                                                  |
| 1 – Poor            | Performance endangered or potentially endangered patient safety, serious remediation is required                             |
| <i>Not observed</i> | Skill could not be observed in this scenario                                                                                 |

ANTS System-Observation and Rating Sheet. 2004. (Accessed May 1, 2006, at <http://www.abdn.ac.uk/iprc/papers%20reports/Ants/ANTS%20System%20Observation%20Rating%20Sheet.doc.>)
